# Supplementary material for: Evaluation of a Paleontological Museum as Geosite and Base for Geotourism. A Case Study
Source: MDPI journal article supplement (doi:10.3390/heritage4030067), 2021-07-12
Supplement: s1 [file s1]

## SUPPLEMENTARY MATERIALS

Article

# Evaluation of a Paleontological Museum as Geosite and Basis for Geotourism. A Case Study.

Supplementary Materials:

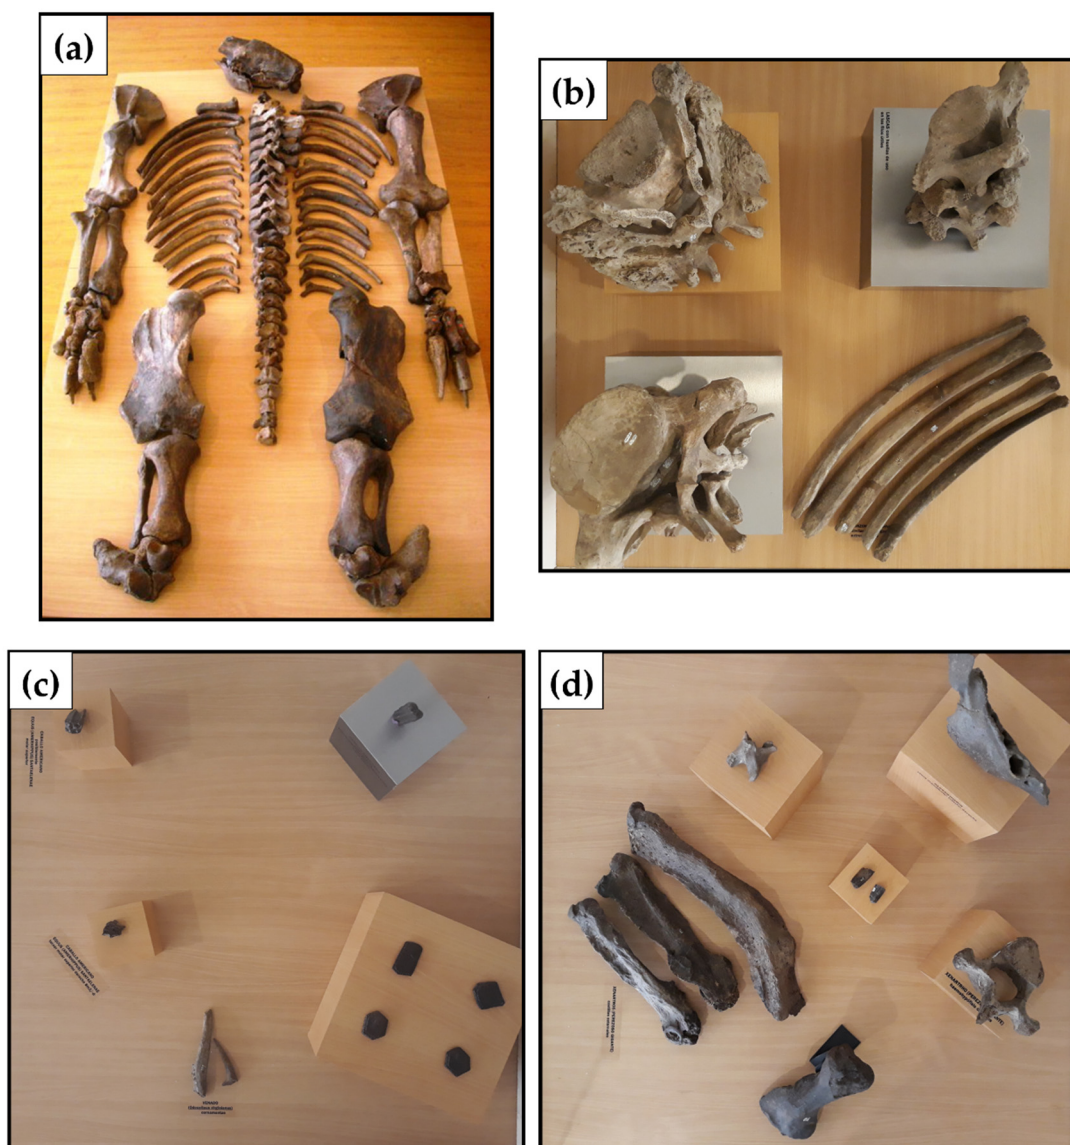

**Figure S1.** Fossils from the Palaeontological Museum: (a) Fossil bones of Megatherium; (b) Fossil Mastodon ribs and vertebrae; (c) Evidence of Pampaterio and American Horse; (d) Evidence of Giant Glosoterio and Deer. Source: Megatherium Palaeontological Museum (MPM).
